# Supplementary material
Source: MDPI journal article supplement (https://www.mdpi.com/2073-4395/13/3/658)
Supplement: s1 [file s1]

# Ergot and sterility in bahiagrass: genotypic and environmental effects on seed yield potential

Javier Do Canto<sup>1</sup>, Rafael Reyno<sup>1</sup>, Hector Oberti<sup>2</sup>, Marco Dalla Rizza<sup>3</sup> and Daniel Real<sup>4\*</sup>

**Supplementary Table 1. Description of soils and climatic variables for the locations of the experiment.**

**a. Classification, description, and analytic data of the dominant soils of each of the three locations of the experiment.**

| Soil Taxonomy approximation [50] | Texture    | Soil drainage                     | Natural Fertility | Analytic data [51] |                  |          |            |                   |
|----------------------------------|------------|-----------------------------------|-------------------|--------------------|------------------|----------|------------|-------------------|
|                                  |            |                                   |                   | Depth (cm)         | Organic Matter % | pH (H2O) | CIC (pH 7) | Base Saturation % |
| <i>Palo-a-pique</i>              |            |                                   |                   |                    |                  |          |            |                   |
| Typic Argiudolls                 | Loam       | Moderately to imperfectly drained | Medium            | 65                 | 4.4              | 5.5      | 18.4       | 78                |
| <i>Tacuarembó</i>                |            |                                   |                   |                    |                  |          |            |                   |
| Typic Hapludalfs                 | Loamy sand | Well drained                      | Very low          | 145                | 1.5              | 5.8      | 5.2        | 73*               |
| <i>Glencoe</i>                   |            |                                   |                   |                    |                  |          |            |                   |
| Typic Hapluderts                 | Clay       | Imperfectly to moderatelv drained | High              | 80                 | 8.7              | 5.9      | 57.1       | 82                |

[50] Durán, A., Califra, A., Molfino, J. H., & Lynn, W. (2006). Keys to soil taxonomy for Uruguay. US Department of Agriculture, Natural Resources Conservation Service, Washington, DC.

[51] Durán, A. Los suelos del Uruguay, 2nd ed.; Hemisferio Sur, Montevideo, Uruguay, 1991.

\*With significant presence of Aluminum

**b. Climatic variables for the two periods of evaluation and for the three locations of the experiment: rainfall, maximum and minimum mean temperatures.**

| Accumulated Rainfall (mm)               |         |          | Year 1 |         |          | Year 2 |         |          |
|-----------------------------------------|---------|----------|--------|---------|----------|--------|---------|----------|
| Location                                | January | February | March  | January | February | March  | January | February |
| Palo-a-Pique                            | 109.5   | 449.1    | 110.4  | 106.73  | 122.3    | 101.8  |         |          |
| Tacuarembó                              | 115.9   | 503.2    | 53     | 83.2    | 120.2    | 97.5   |         |          |
| Glencoe                                 | 112.7   | 457.9    | 36.3   | 53.2    | 101.9    | 42.3   |         |          |
| Minimum daily temperatures average (°C) |         |          | Year 1 |         |          | Year 2 |         |          |
| Location                                | January | February | March  | January | February | March  | January | February |
| Palo-a-Pique                            | 17.3    | 19.2     | 15.5   | 18.1    | 16.9     | 12.4   |         |          |
| Tacuarembó                              | 17.3    | 18.7     | 15.2   | 18.9    | 17.3     | 14.1   |         |          |
| Glencoe                                 | 17.9    | 18.6     | 15.7   | 19.1    | 17.5     | 14.8   |         |          |
| Maximum daily temperatures average (°C) |         |          | Year 1 |         |          | Year 2 |         |          |
| Location                                | January | February | March  | January | February | March  | January | February |
| Palo-a-Pique                            | 29.5    | 28.3     | 27.4   | 31.5    | 28.7     | 26.7   |         |          |
| Tacuarembó                              | 28.4    | 28.2     | 27.1   | 31.5    | 27.8     | 27.6   |         |          |

|         |      |      |      |      |      |      |
|---------|------|------|------|------|------|------|
| Glencoe | 31.0 | 29.3 | 29.1 | 34.0 | 30.7 | 28.9 |
|---------|------|------|------|------|------|------|
