# Supplementary material
Source: MDPI journal article supplement (https://www.mdpi.com/2073-4395/13/3/658)
Supplement: s1 [file s1]

# Ergot and sterility in bahiagrass: genotypic and environmental effects on seed yield potential

Javier Do Canto<sup>1</sup>, Rafael Reyno<sup>1</sup>, Hector Oberti<sup>2</sup>, Marco Dalla Rizza<sup>3</sup> and Daniel Real<sup>4\*</sup>

**Supplementary Table 2. Type III ANOVA tables, REML covariance parameter estimates with standard errors for the different traits measured in the experiment.**

| Number of seed-heads per plant (square-root). Type 3 Analysis of Variance |     |                |             |          |         |        | Covariance Parameter Estimates REML |          |         |
|---------------------------------------------------------------------------|-----|----------------|-------------|----------|---------|--------|-------------------------------------|----------|---------|
| Source                                                                    | DF  | Sum of Squares | Mean Square | Error DF | F Value | Pr > F | Cov Parm                            | Estimate | SE      |
| loc                                                                       | 2   | 46.67839       | 23.339195   | 2.9658   | 0.2     | 0.8305 | loc                                 | 0        | .       |
| block(loc)                                                                | 6   | 157.128231     | 26.188039   | 96       | 5.19    | 0.0001 | block(loc)                          | 0.5661   | 0.3714  |
| genotype                                                                  | 16  | 1243.856783    | 77.741049   | 17.073   | 3.92    | 0.0039 | genotype                            | 3.0352   | 1.4568  |
| loc*genotype                                                              | 32  | 159.241527     | 4.976298    | 25.161   | 1.05    | 0.4531 | loc*genotype                        | 0        | .       |
| block*genotype(loc)                                                       | 96  | 484.213439     | 5.04389     | 102      | 1.22    | 0.162  | block*genotype(loc)                 | 0.1247   | 0.3549  |
| year                                                                      | 1   | 2721.034332    | 2721.034332 | 2.6561   | 24.62   | 0.0208 | year                                | 17.7783  | 25.8484 |
| loc*year                                                                  | 2   | 191.346886     | 95.673443   | 32       | 25.03   | <.0001 | loc*year                            | 1.1559   | 0.9033  |
| genotype*year                                                             | 16  | 298.761717     | 18.672607   | 32       | 4.88    | <.0001 | genotype*year                       | 1.439    | 0.6844  |
| loc*genotype*year                                                         | 32  | 122.333829     | 3.822932    | 102      | 0.92    | 0.5877 | loc*genotype*year                   | 0.143    | 0.2941  |
| Residual                                                                  | 102 | 421.885338     | 4.136131    | .        | .       | .      | Residual                            | 3.8058   | 0.5114  |

  

| Seed-head weight (logarithm). Type 3 Analysis of Variance |    |                |             |          |         |        | Covariance Parameter Estimates REML |          |          |
|-----------------------------------------------------------|----|----------------|-------------|----------|---------|--------|-------------------------------------|----------|----------|
| Source                                                    | DF | Sum of Squares | Mean Square | Error DF | F Value | Pr > F | Cov Parm                            | Estimate | SE       |
| loc                                                       | 2  | 15.929748      | 7.964874    | 2.0853   | 0.36    | 0.7359 | loc                                 | 0        | .        |
| block(loc)                                                | 6  | 3.383089       | 0.563848    | 98.319   | 4.64    | 0.0003 | block(loc)                          | 0.01422  | 0.01025  |
| genotype                                                  | 16 | 10.853781      | 0.678361    | 17.149   | 2.07    | 0.0729 | genotype                            | 0.02309  | 0.01526  |
| loc*genotype                                              | 32 | 4.330622       | 0.135332    | 17.775   | 1.3     | 0.282  | loc*genotype                        | 0.001244 | 0.006218 |
| block*genotype(loc)                                       | 94 | 11.427739      | 0.121572    | 94       | 1.03    | 0.4473 | block*genotype(loc)                 | 0.00301  | 0.01164  |
| year                                                      | 1  | 23.778797      | 23.778797   | 2.0348   | 1.09    | 0.4047 | year                                | 0.07982  | 0.2663   |
| loc*year                                                  | 2  | 43.49469       | 21.747345   | 35.127   | 214.54  | <.0001 | loc*year                            | 0.2989   | 0.2146   |
| genotype*year                                             | 16 | 4.688571       | 0.293036    | 33.43    | 2.9     | 0.0046 | genotype*year                       | 0.01881  | 0.01133  |
| loc*genotype*year                                         | 32 | 3.22158        | 0.100674    | 94       | 0.85    | 0.6912 | loc*genotype*year                   | 0        | .        |
| Residual                                                  | 94 | 11.118581      | 0.118283    | .        | .       | .      | Residual                            | 0.1148   | 0.01445  |

| Severity of infection (square-root). Type 3 Analysis of Variance |    |                |             |          |         |        | Covariance Parameter Estimates REML |          |         |
|------------------------------------------------------------------|----|----------------|-------------|----------|---------|--------|-------------------------------------|----------|---------|
| Source                                                           | DF | Sum of Squares | Mean Square | Error DF | F Value | Pr > F | Cov Parm                            | Estimate | SE      |
| loc                                                              | 2  | 153.421731     | 76.710866   | 1.9902   | 1.5     | 0.4006 | loc                                 | 0.3228   | 0.9702  |
| block(loc)                                                       | 6  | 3.108828       | 0.518138    | 97.62    | 0.53    | 0.7875 | block(loc)                          | 0        | .       |
| genotype                                                         | 16 | 427.950178     | 26.746886   | 15.3     | 6.85    | 0.0002 | genotype                            | 1.3449   | 0.56    |
| loc*genotype                                                     | 32 | 63.979229      | 1.999351    | 26.186   | 1.21    | 0.3114 | loc*genotype                        | 0.04353  | 0.1184  |
| block*genotype(loc)                                              | 94 | 92.645454      | 0.98559     | 95       | 1.01    | 0.4894 | block*genotype(loc)                 | 0        | .       |
| year                                                             | 1  | 47.109622      | 47.109622   | 2.1486   | 0.9     | 0.4378 | year                                | 0        | .       |
| loc*year                                                         | 2  | 101.926826     | 50.963413   | 33.511   | 31.41   | <.0001 | loc*year                            | 1.0378   | 0.8863  |
| genotype*year                                                    | 16 | 56.761035      | 3.547565    | 32.675   | 2.17    | 0.0299 | genotype*year                       | 0.2106   | 0.1545  |
| loc*genotype*year                                                | 32 | 52.73048       | 1.647828    | 95       | 1.68    | 0.0282 | loc*genotype*year                   | 0.2739   | 0.1603  |
| Residual                                                         | 95 | 93.128245      | 0.980297    | .        | .       | .      | Residual                            | 0.9715   | 0.09856 |

| Total seed yield per plant (logarithm). Type 3 Analysis of Variance |    |                |             |          |         |        | Covariance Parameter Estimates REML |          |         |
|---------------------------------------------------------------------|----|----------------|-------------|----------|---------|--------|-------------------------------------|----------|---------|
| Source                                                              | DF | Sum of Squares | Mean Square | Error DF | F Value | Pr > F | Cov Parm                            | Estimate | SE      |
| year                                                                | 1  | 72.840777      | 72.840777   | 1.9571   | 8.26    | 0.1054 | loc                                 | 0.05552  | 0.1964  |
| loc                                                                 | 2  | 29.241048      | 14.620524   | 2.4879   | 1.45    | 0.3826 | block(loc)                          | 0.03662  | 0.02777 |
| block(loc)                                                          | 6  | 8.844301       | 1.47405     | 98.933   | 4.14    | 0.0009 | genotype                            | 0.4298   | 0.1657  |
| genotype                                                            | 16 | 128.56679      | 8.035424    | 6.6487   | 15.43   | 0.0008 | loc*genotype                        | 0.011    | 0.03553 |
| loc*genotype                                                        | 32 | 19.894476      | 0.621702    | 22.85    | 1.06    | 0.449  | block*genotype(loc)                 | 0        | .       |
| block*genotype(loc)                                                 | 94 | 33.382782      | 0.355136    | 94       | 0.9     | 0.6951 | year                                | 0.4689   | 0.7606  |
| loc*year                                                            | 2  | 17.908348      | 8.954174    | 33.67    | 14.54   | <.0001 | loc*year                            | 0.1885   | 0.2007  |
| genotype*year                                                       | 16 | 8.373541       | 0.523346    | 32.766   | 0.84    | 0.632  | genotype*year                       | 0        | .       |
| loc*genotype*year                                                   | 32 | 19.995121      | 0.624848    | 94       | 1.58    | 0.0461 | loc*genotype*year                   | 0.07699  | 0.04409 |
| Residual                                                            | 94 | 37.099712      | 0.394678    | .        | .       | .      | Residual                            | 0.3754   | 0.03864 |

| % Full seeds (arcsine-square-root). Type 3 Analysis of Variance |    |                |             |          |         |        | Covariance Parameter Estimates REML |          |          |
|-----------------------------------------------------------------|----|----------------|-------------|----------|---------|--------|-------------------------------------|----------|----------|
| Source                                                          | DF | Sum of Squares | Mean Square | Error DF | F Value | Pr > F | Cov Parm                            | Estimate | SE       |
| loc                                                             | 1  | 4.030305       | 4.030305    | 9.8943   | 80.38   | <.0001 | loc                                 | 0.08208  | 0.1173   |
| block(loc)                                                      | 4  | 0.101144       | 0.025286    | 62       | 1.88    | 0.125  | block(loc)                          | 0.000663 | 0.001076 |
| genotype                                                        | 16 | 0.400187       | 0.025012    | 16       | 0.65    | 0.8    | genotype                            | 0        | .        |
| loc*genotype                                                    | 16 | 0.614572       | 0.038411    | 62       | 2.86    | 0.0016 | loc*genotype                        | 0.005895 | 0.002825 |
| Residual                                                        | 62 | 0.833374       | 0.013442    | .        | .       | .      | Residual                            | 0.01361  | 0.002468 |

| % Empty seeds. Type 3 Analysis of Variance |    |                |             |          |         |        | Covariance Parameter Estimates REML |          |         |
|--------------------------------------------|----|----------------|-------------|----------|---------|--------|-------------------------------------|----------|---------|
| Source                                     | DF | Sum of Squares | Mean Square | Error DF | F Value | Pr > F | Cov Parm                            | Estimate | SE      |
| loc                                        | 1  | 591.138636     | 591.138636  | 9.1468   | 1.52    | 0.2478 | loc                                 | 4.0259   | 17.124  |
| block(loc)                                 | 4  | 919.053556     | 229.763389  | 62       | 3.4     | 0.0142 | block(loc)                          | 9.7819   | 9.7562  |
| genotype                                   | 16 | 4481.04556     | 280.065347  | 16       | 1.24    | 0.3382 | genotype                            | 8.7431   | 21.5382 |
| loc*genotype                               | 16 | 3624.222781    | 226.513924  | 62       | 3.35    | 0.0003 | loc*genotype                        | 54.216   | 27.5597 |
| Residual                                   | 62 | 4195.969777    | 67.676932   | .        | .       | .      | Residual                            | 67.4669  | 12.0814 |

| % Ergot sclerotia. Type 3 Analysis of Variance |    |                |             |          |         |        |
|------------------------------------------------|----|----------------|-------------|----------|---------|--------|
| Source                                         | DF | Sum of Squares | Mean Square | Error DF | F Value | Pr > F |
| loc                                            | 1  | 18691          | 18691       | 6.8026   | 42.08   | 0.0004 |
| block(loc)                                     | 4  | 1303.222378    | 325.805594  | 62       | 4.24    | 0.0042 |
| genotype                                       | 16 | 5221.164918    | 326.322807  | 16       | 1.67    | 0.1584 |
| loc*genotype                                   | 16 | 3131.796686    | 195.737293  | 62       | 2.55    | 0.0044 |
| Residual                                       | 62 | 4762.467622    | 76.813994   | .        | .       | .      |

| Covariance Parameter Estimates REML |          |         |
|-------------------------------------|----------|---------|
| Cov Parm                            | Estimate | SE      |
| loc                                 | 376.65   | 545.74  |
| block(loc)                          | 15.95    | 14.6753 |
| genotype                            | 21.2132  | 22.4039 |
| loc*genotype                        | 39.7874  | 24.6968 |
| Residual                            | 77.6739  | 14.0948 |

| Total seeds TSW. Type 3 Analysis of Variance |    |                |             |          |         |        |
|----------------------------------------------|----|----------------|-------------|----------|---------|--------|
| Source                                       | DF | Sum of Squares | Mean Square | Error DF | F Value | Pr > F |
| loc                                          | 1  | 34.67602       | 34.67602    | 9.3847   | 177.09  | <.0001 |
| block(loc)                                   | 4  | 0.420581       | 0.105145    | 62       | 2       | 0.1054 |
| genotype                                     | 16 | 4.906089       | 0.306631    | 16       | 2.13    | 0.0699 |
| loc*genotype                                 | 16 | 2.297941       | 0.143621    | 62       | 2.73    | 0.0024 |
| Residual                                     | 62 | 3.257752       | 0.052544    | .        | .       | .      |

| Covariance Parameter Estimates REML |          |          |
|-------------------------------------|----------|----------|
| Cov Parm                            | Estimate | SE       |
| loc                                 | 0.6973   | 0.9916   |
| block(loc)                          | 0.003    | 0.004413 |
| genotype                            | 0.02744  | 0.02014  |
| loc*genotype                        | 0.03065  | 0.01741  |
| Residual                            | 0.05252  | 0.009425 |

| Full seeds TSW. Type 3 Analysis of Variance |    |                |             |          |         |        |
|---------------------------------------------|----|----------------|-------------|----------|---------|--------|
| Source                                      | DF | Sum of Squares | Mean Square | Error DF | F Value | Pr > F |
| loc                                         | 1  | 16.853841      | 16.853841   | 9.0384   | 388.04  | <.0001 |
| block(loc)                                  | 4  | 0.047718       | 0.01193     | 62       | 0.59    | 0.6711 |
| genotype                                    | 16 | 12.596863      | 0.787304    | 16       | 15.18   | <.0001 |
| loc*genotype                                | 16 | 0.829811       | 0.051863    | 62       | 2.57    | 0.0042 |
| Residual                                    | 62 | 1.253465       | 0.020217    | .        | .       | .      |

| Covariance Parameter Estimates REML |          |          |
|-------------------------------------|----------|----------|
| Cov Parm                            | Estimate | SE       |
| loc                                 | 0.3384   | 0.4799   |
| block(loc)                          | 0        | .        |
| genotype                            | 0.1229   | 0.04663  |
| loc*genotype                        | 0.01084  | 0.006263 |
| Residual                            | 0.01968  | 0.003418 |

| Empty seeds TSW. Type 3 Analysis of Variance |    |                |             |          |         |        |
|----------------------------------------------|----|----------------|-------------|----------|---------|--------|
| Source                                       | DF | Sum of Squares | Mean Square | Error DF | F Value | Pr > F |
| loc                                          | 1  | 3.115726       | 3.115726    | 6.2119   | 91.07   | <.0001 |
| block(loc)                                   | 4  | 0.097084       | 0.024271    | 62       | 1.65    | 0.1725 |
| genotype                                     | 16 | 3.23469        | 0.202168    | 16       | 8.19    | <.0001 |
| loc*genotype                                 | 16 | 0.394839       | 0.024677    | 62       | 1.68    | 0.0749 |
| Residual                                     | 62 | 0.910783       | 0.01469     | .        | .       | .      |

| Covariance Parameter Estimates REML |          |          |
|-------------------------------------|----------|----------|
| Cov Parm                            | Estimate | SE       |
| loc                                 | 0.06253  | 0.08942  |
| block(loc)                          | 0.000593 | 0.00104  |
| genotype                            | 0.02962  | 0.01204  |
| loc*genotype                        | 0.003468 | 0.003081 |
| Residual                            | 0.01462  | 0.002616 |

| Ergot sclerotia TSW. Type 3 Analysis of Variance |    |                |             |          |         |        |
|--------------------------------------------------|----|----------------|-------------|----------|---------|--------|
| Source                                           | DF | Sum of Squares | Mean Square | Error DF | F Value | Pr > F |
| loc                                              | 1  | 33.04617       | 33.04617    | 7.2223   | 64.11   | <.0001 |
| block(loc)                                       | 4  | 1.454217       | 0.363554    | 62       | 4.08    | 0.0053 |
| genotype                                         | 16 | 10.381651      | 0.648853    | 16       | 2.68    | 0.0282 |
| loc*genotype                                     | 16 | 3.867505       | 0.241719    | 62       | 2.71    | 0.0026 |
| Residual                                         | 62 | 5.525683       | 0.089124    | .        | .       | .      |

| Covariance Parameter Estimates REML |          |         |
|-------------------------------------|----------|---------|
| Cov Parm                            | Estimate | SE      |
| loc                                 | 0.6547   | 0.9408  |
| block(loc)                          | 0.0172   | 0.01604 |
| genotype                            | 0.06994  | 0.04179 |
| loc*genotype                        | 0.05172  | 0.02934 |
| Residual                            | 0.08891  | 0.01593 |
